# Supplementary material for: Lymphatic outflow of cerebrospinal fluid is reduced in glioma
Source: PubMed Central journal article supplement (PMC6794292; doi:10.1038/s41598-019-51373-9), 2019-10-15
Supplement: 41598_2019_51373_MOESM1_ESM.pdf [file 41598_2019_51373_MOESM1_ESM.pdf]

## Supplementary Information

### Lymphatic outflow of cerebrospinal fluid is reduced in glioma

Qiaoli Ma<sup>1</sup>, Felix Schlegel<sup>2,3</sup>, Samia B. Bachmann<sup>1</sup>, Hannah Schneider<sup>4</sup>, Yann Decker<sup>5</sup>,  
Markus Rudin<sup>2,3,6</sup>, Michael Weller<sup>4</sup>, Steven T. Proulx<sup>1,7\*</sup>, Michael Detmar<sup>1\*</sup>

<sup>1</sup>Institute of Pharmaceutical Sciences, Swiss Federal Institute of Technology, ETH Zurich, Zurich, Switzerland

<sup>2</sup>Institute of Biomedical Engineering, University of Zurich and ETH Zurich, Zurich, Switzerland

<sup>3</sup>Neuroscience Center Zurich, University of Zurich and ETH Zurich, Zurich, Switzerland

<sup>4</sup>Laboratory of Molecular Neuro-Oncology, Department of Neurology, University Hospital and University of Zurich, Zurich, Switzerland

<sup>5</sup>Department of Neurology, University of the Saarland, Homburg, Germany

<sup>6</sup>Institute of Pharmacology and Toxicology, University of Zurich, Zurich, Switzerland

<sup>7</sup>Theodor Kocher Institute, University of Bern, Bern, Switzerland

\*Corresponding authors

Email: [michael.detmar@pharma.ethz.ch](mailto:michael.detmar@pharma.ethz.ch), [steven.proulx@tki.unibe.ch](mailto:steven.proulx@tki.unibe.ch)

## Supplementary figures

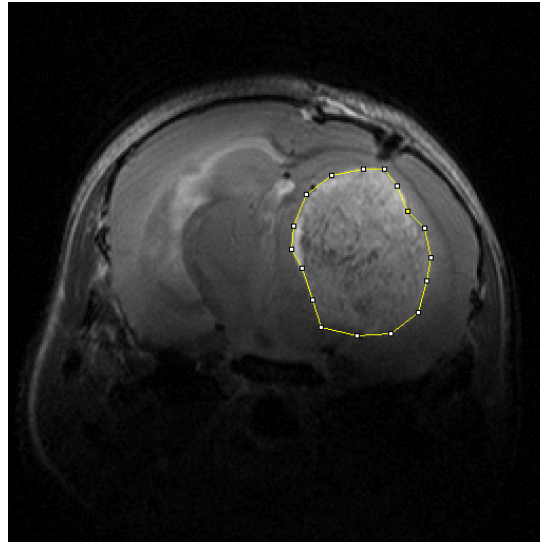

**Fig. S1. Representative image of contrast-enhanced MRI for glioma volume measurement on day 11 after GL261 cell injection.** Yellow line indicates the margin of the glioma indicated by the contrast agent.

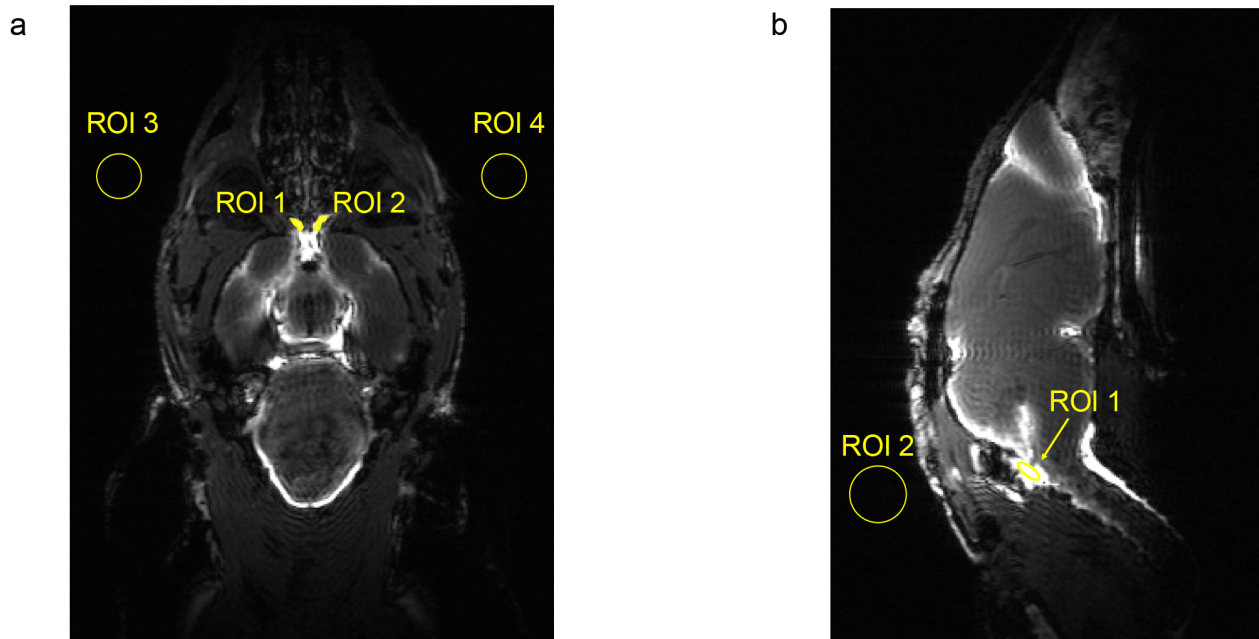

**Fig. S2. ROIs for SNR calculation.** (a) Optic nerve.  $SNR = (\text{Mean Signal Intensity}_{ROI1} / SD_{ROI3} + \text{Mean Signal Intensity}_{ROI2} / SD_{ROI4}) / 2$ . (b) Cisterna magna.  $SNR = \text{Mean Signal Intensity}_{ROI1} / SD_{ROI2}$ .

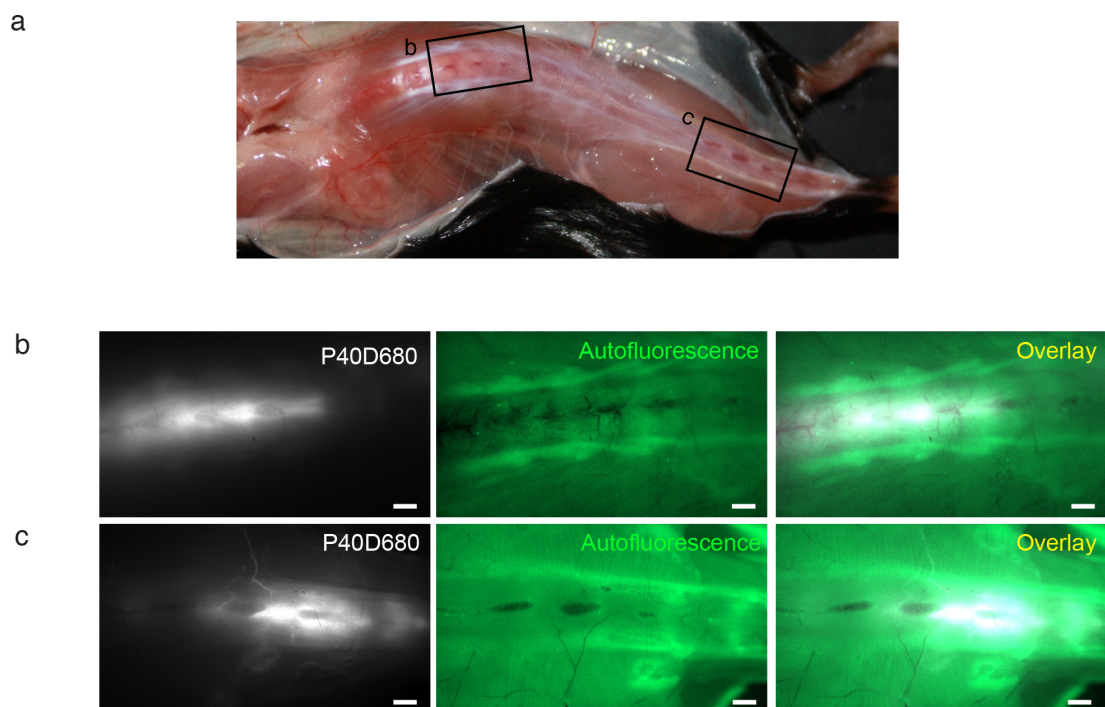

**Fig. S3. Increased tracer signal in spine and scoliosis.** (a) Bright field image of spine of a mouse with scoliosis symptom. Fluorescent images of thoracic (b) and sacral region (c) of the spine. Scale bar: 1000  $\mu\text{m}$ .
